# Supplementary material for: Chromosomal 3q amplicon encodes essential regulators of secretory vesicles that drive secretory addiction in cancer
Source: PubMed Central journal article supplement (PMC11178546; doi:10.1172/jci176355), 2024-04-25

Fig. 2C

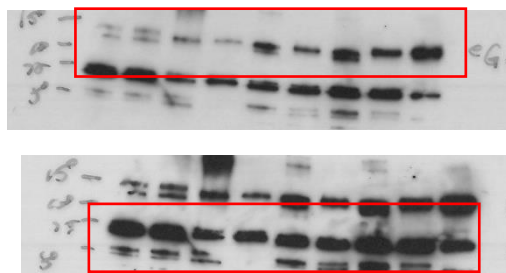

GOLIM4

GOLIM4

Tubulin

Tubulin

Fig. 2D

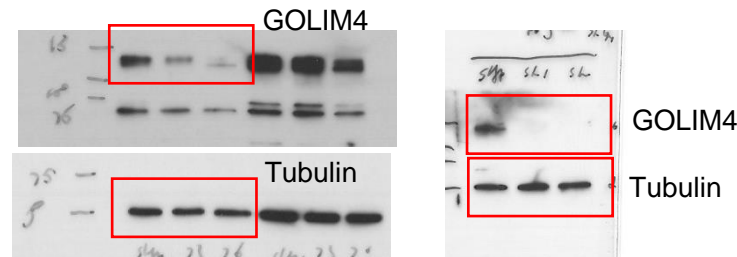

GOLIM4

GOLIM4

Tubulin

Tubulin

Fig. 2H

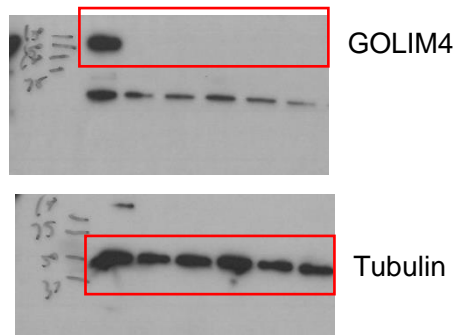

GOLIM4

Tubulin

Fig. 3G

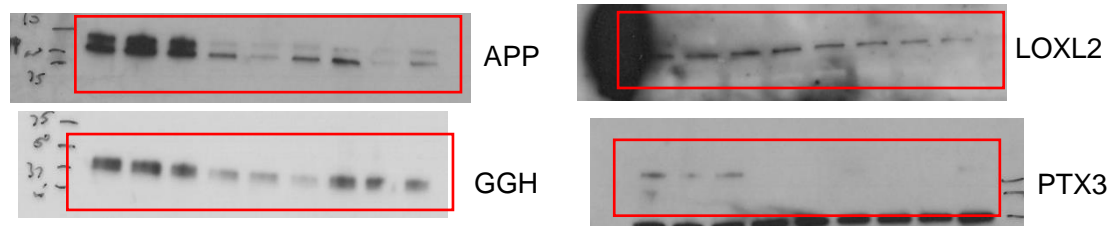

APP

GGH

LOXL2

PTX3

Fig. 3H

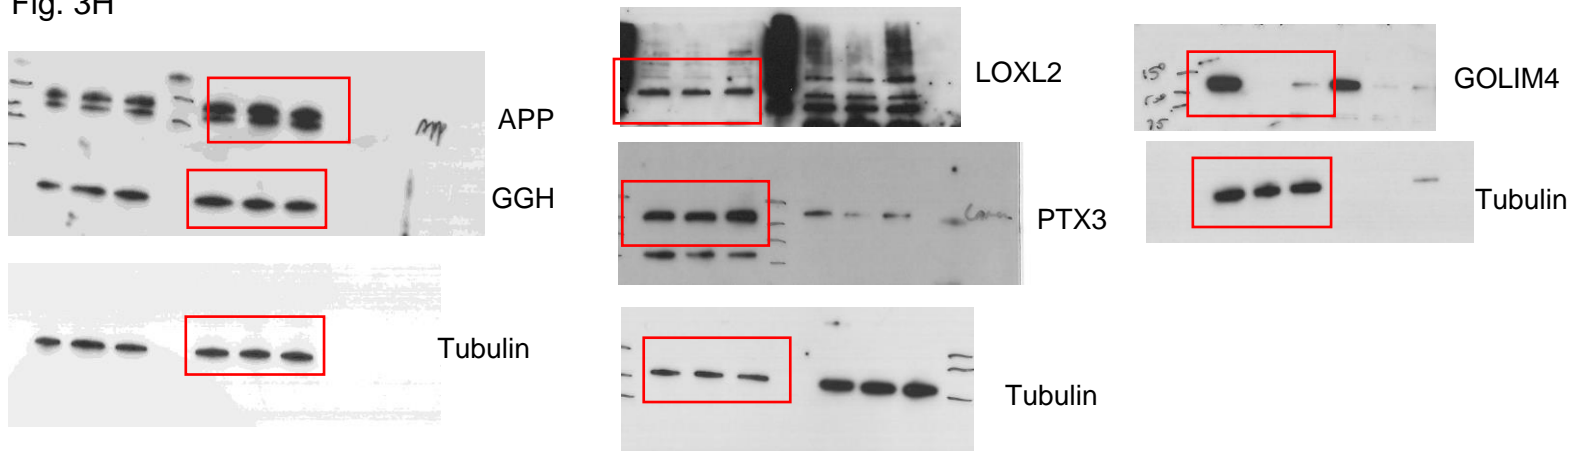

APP

GGH

Tubulin

LOXL2

PTX3

Tubulin

GOLIM4

Tubulin

Fig. 4C

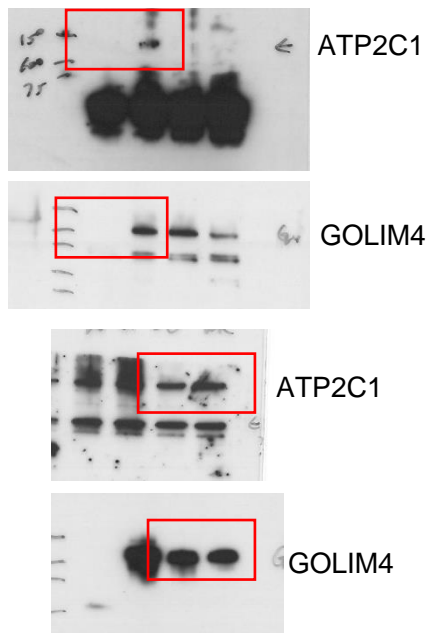

Fig. 4H

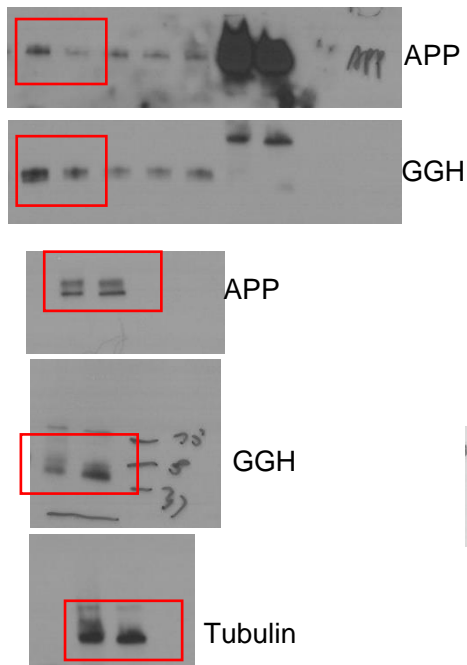

Fig. 4I

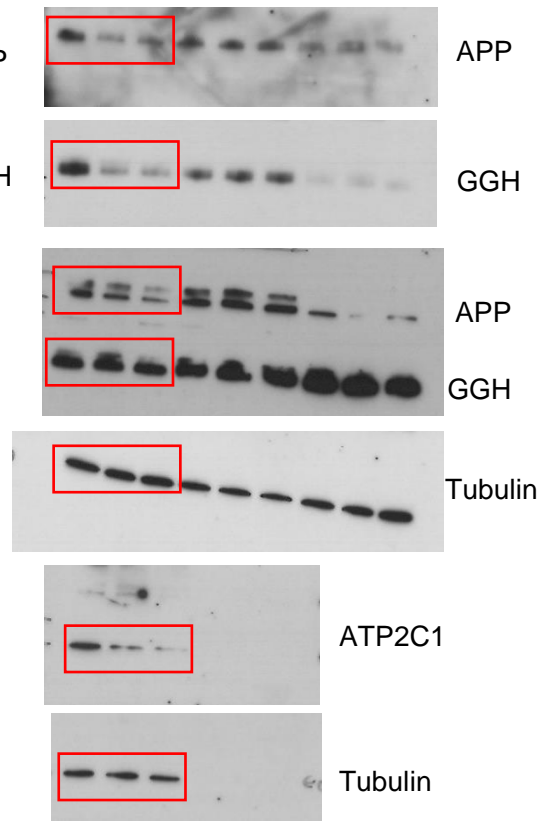

Fig. 4J

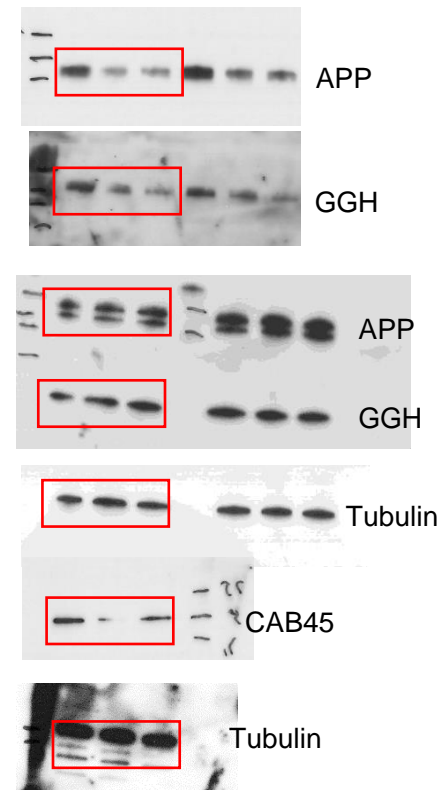

Fig. 4Q

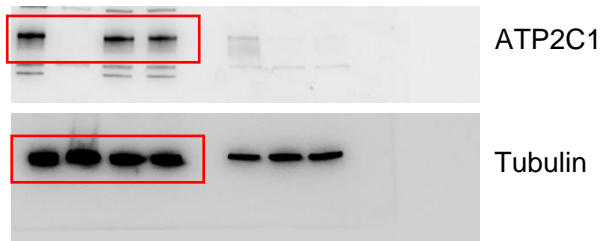

Fig. 5B

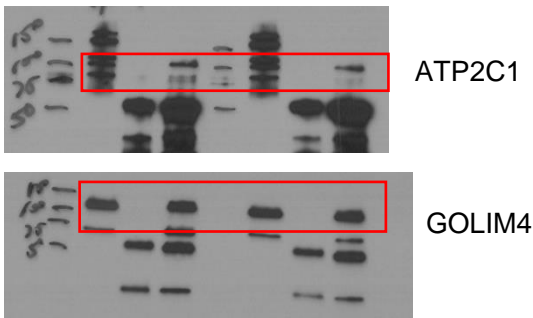

Fig. 5C

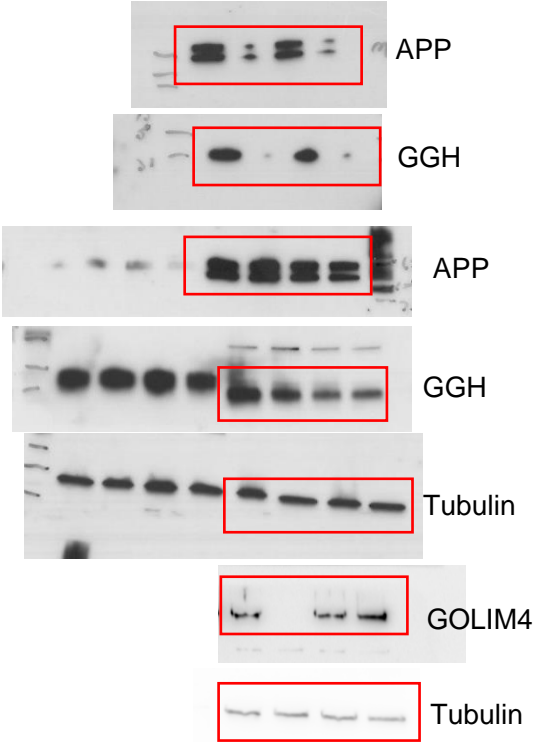

Fig. 5E

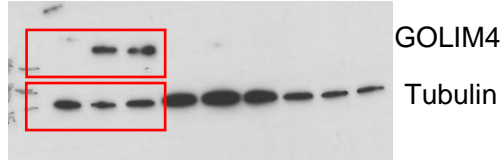

Fig. 5J

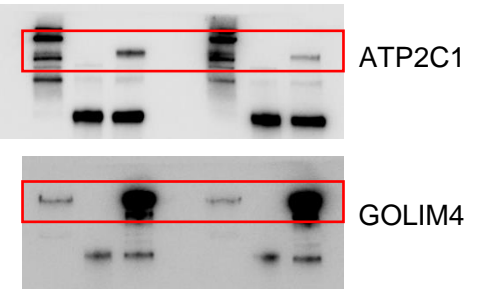

Fig. 5I

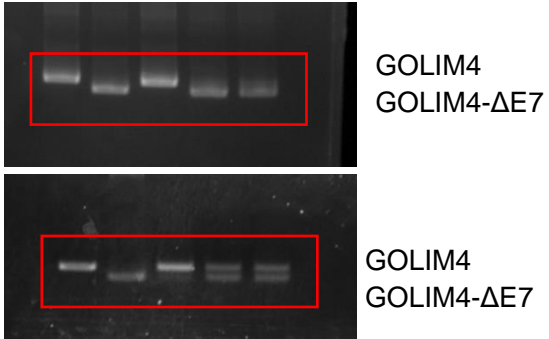

Fig. 6A

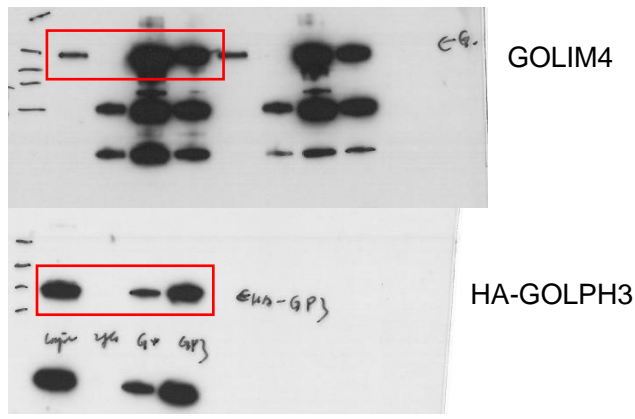

Fig. 6C

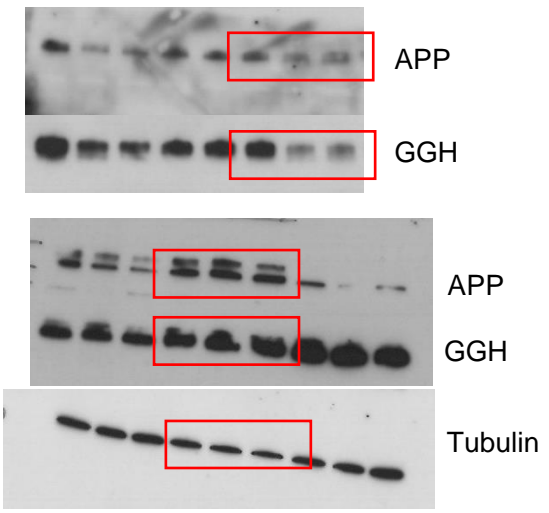

Fig. 6F

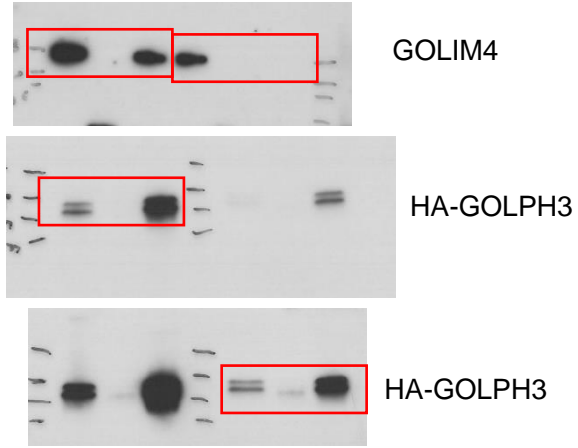

Fig. 6G

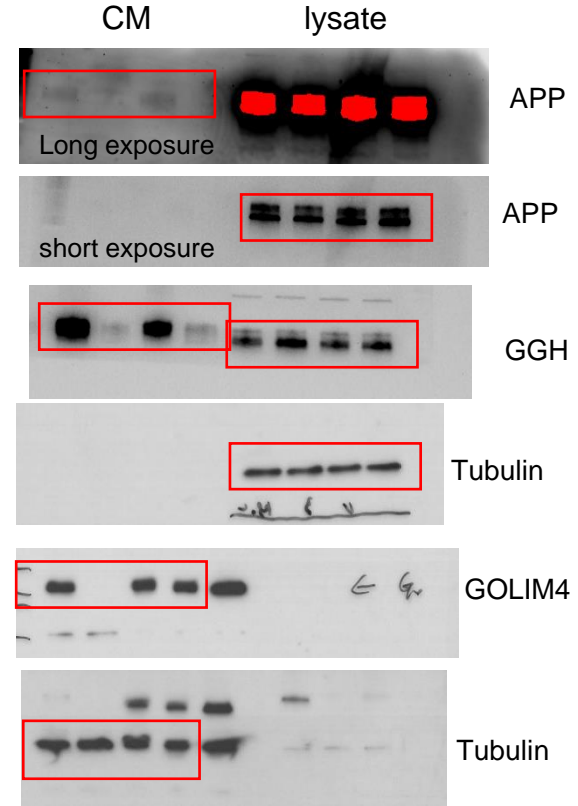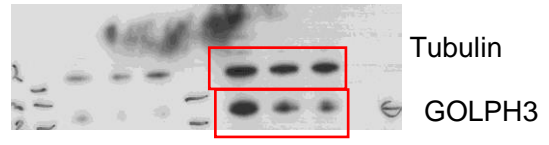

Fig. 7A

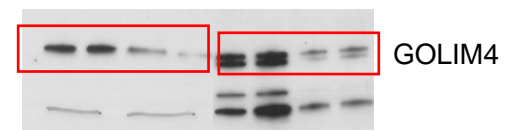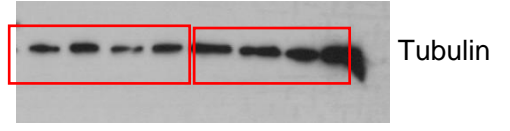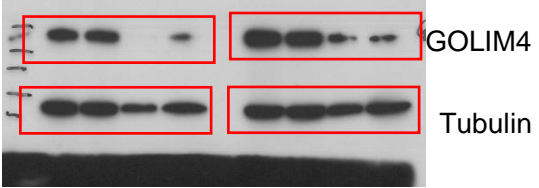

Fig. 7F

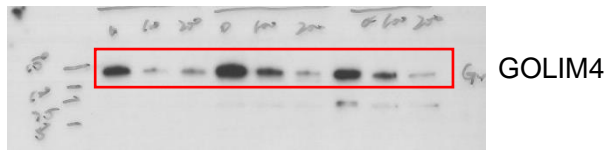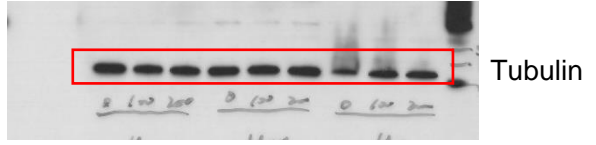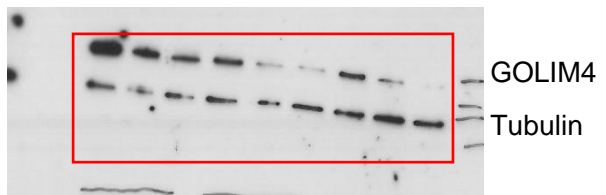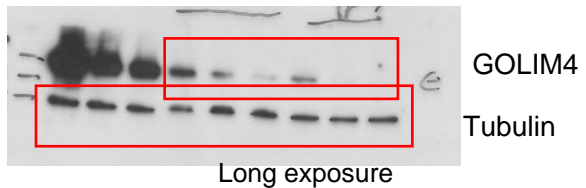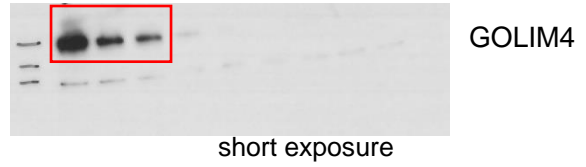



Fig. S1E

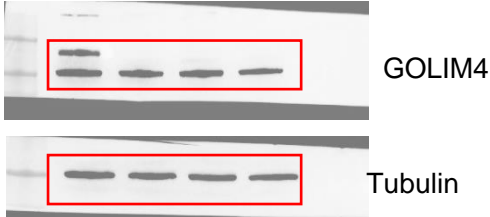

Fig. S1H

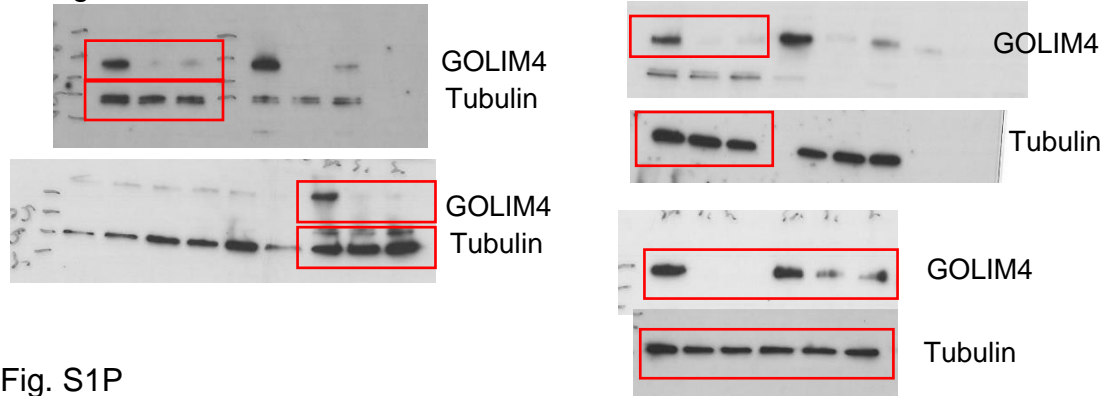

Fig. S1J

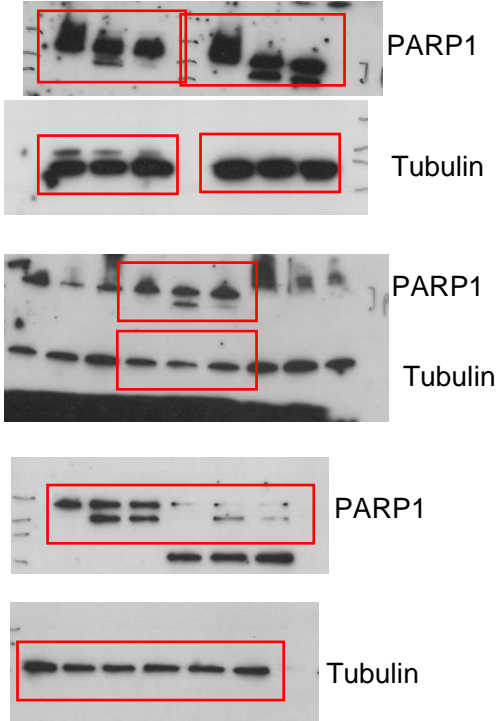

Fig. S1P

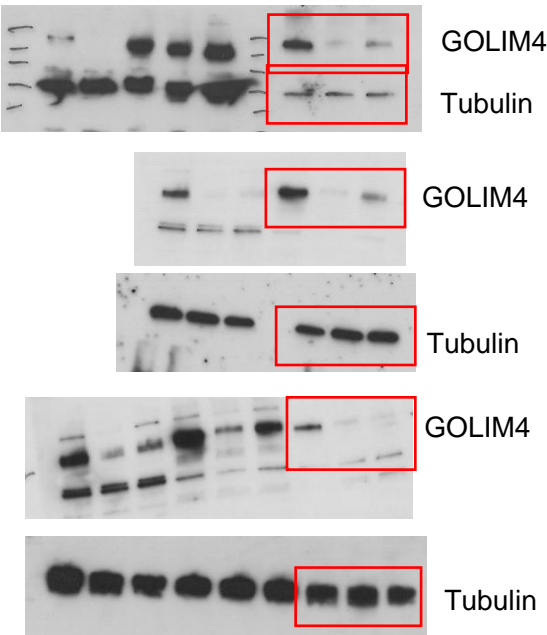

Fig. S2C

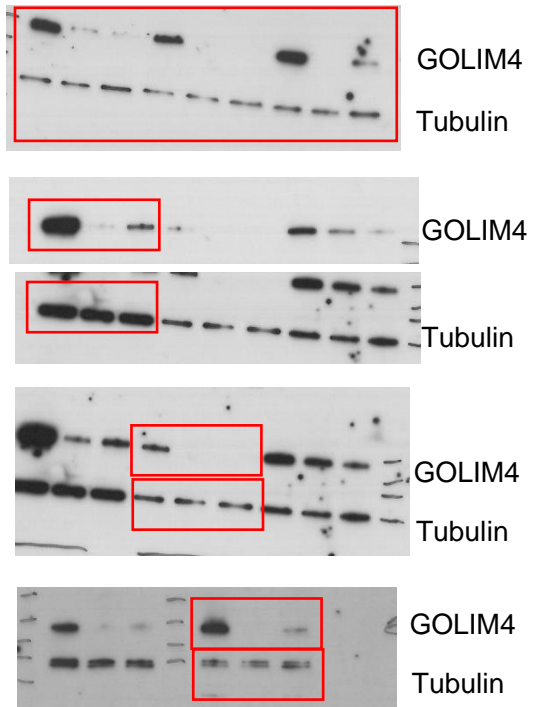

Fig. S2G

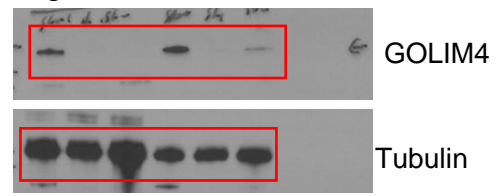

Fig. S3F

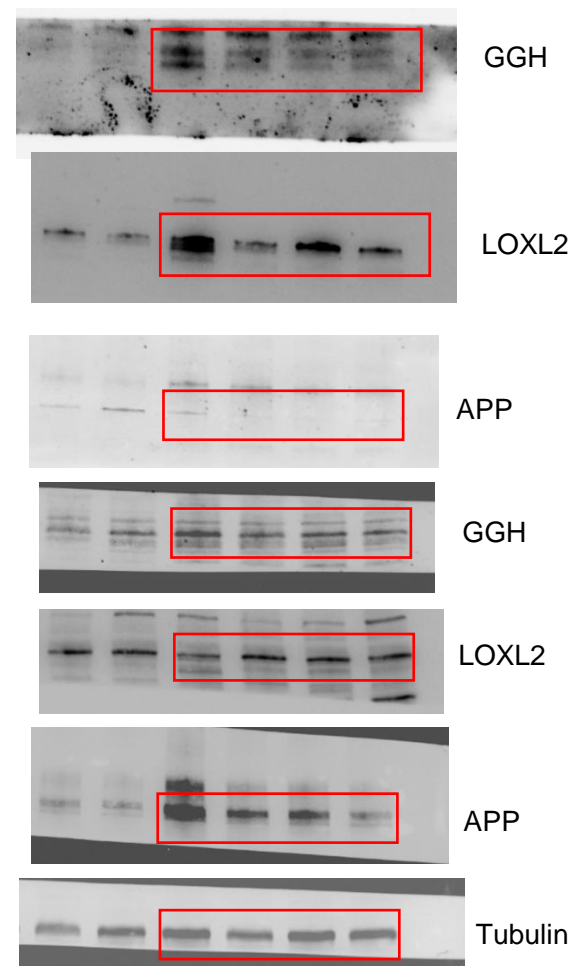

Fig. S3E

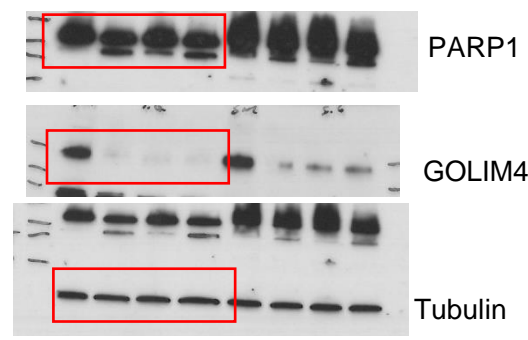

Fig. S3G

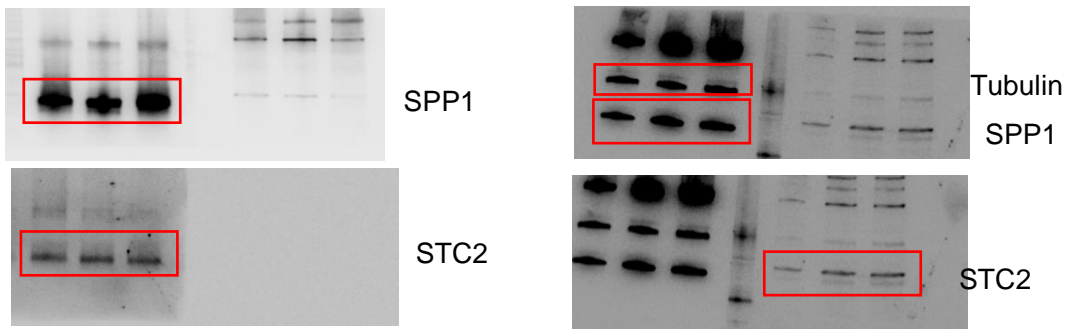



Fig. S4D

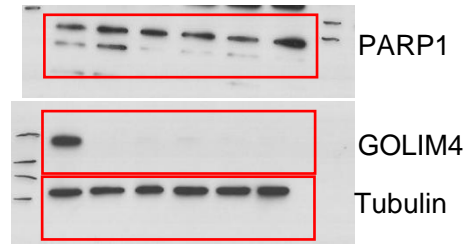

Fig. S4F

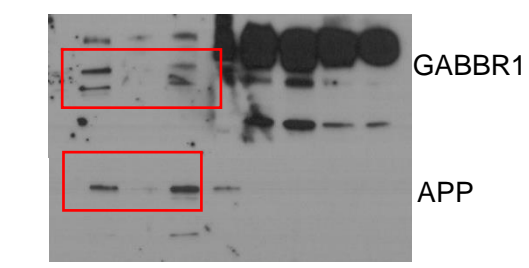

Fig. S4H

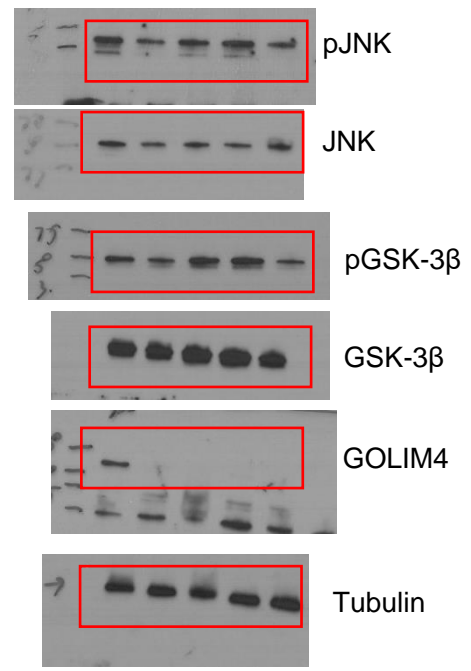

Fig. S6A

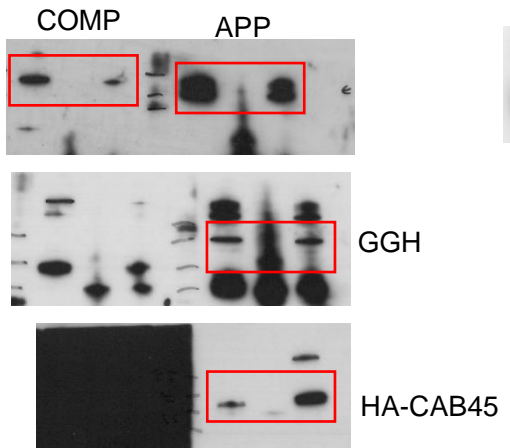

Fig. S6I

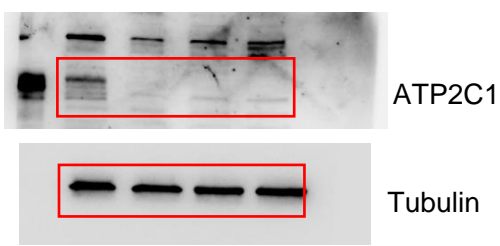

Fig. S7A

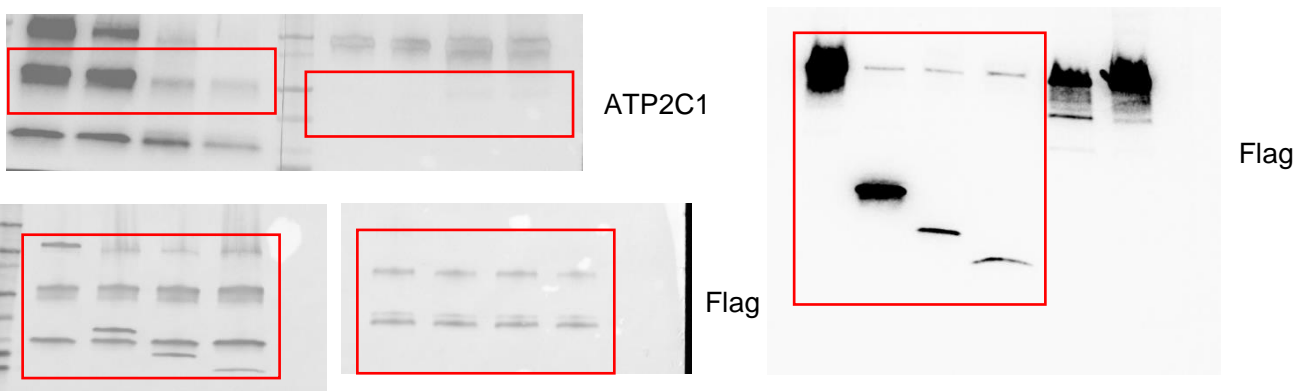

Fig. S8A

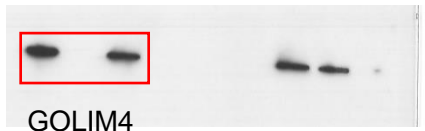

Fig. S9B

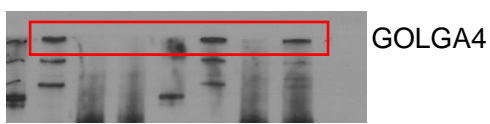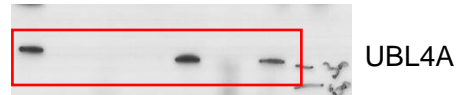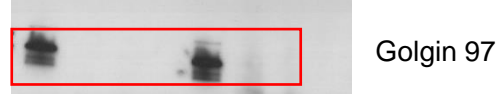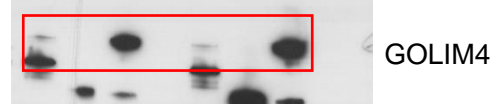

Fig. S8D

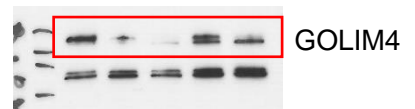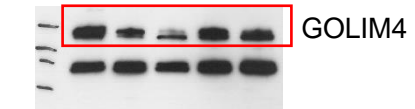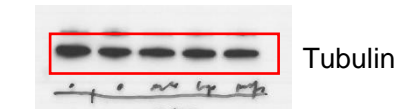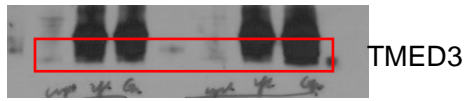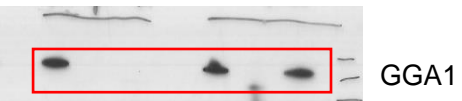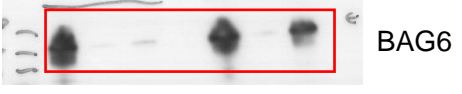

Fig. S9D

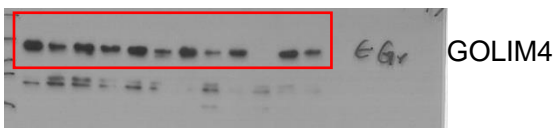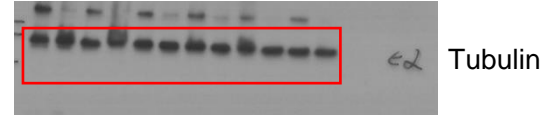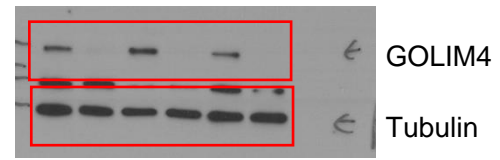

Fig. S10D

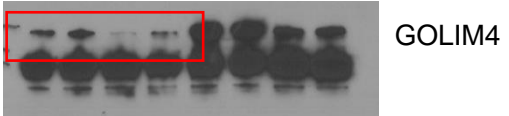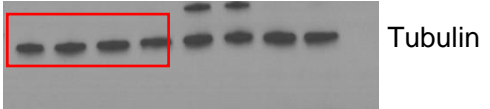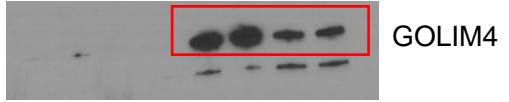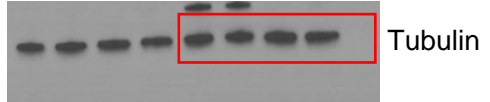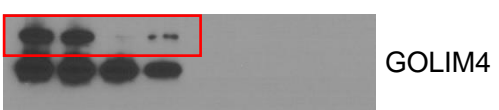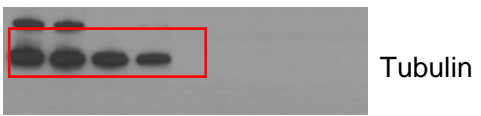

Fig. S10F

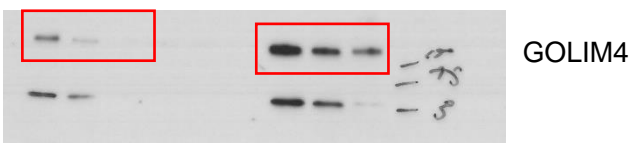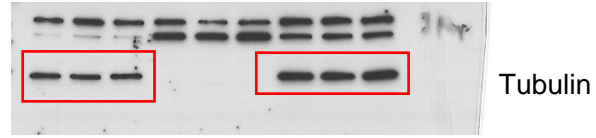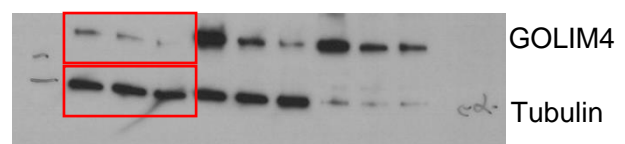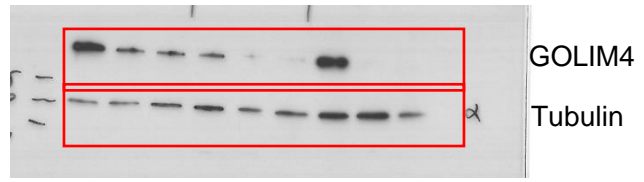

Fig. S11I

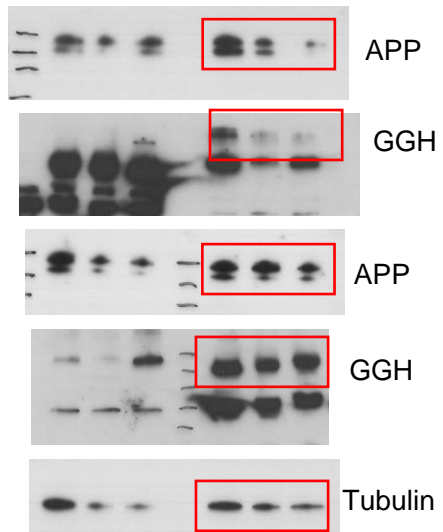

Fig. S11K

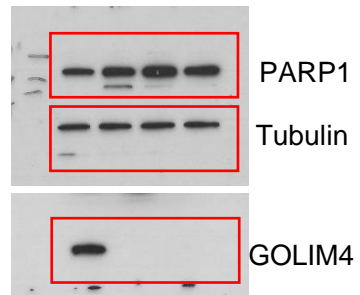

Fig. S11M

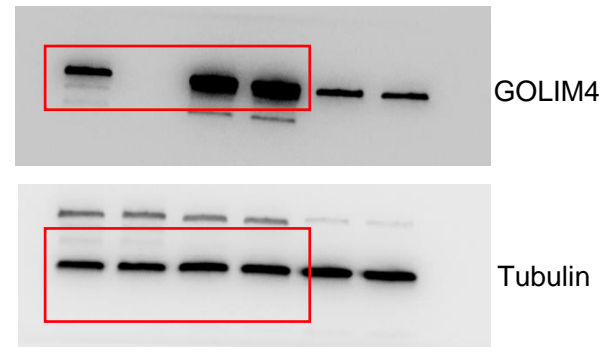

Fig. S11O

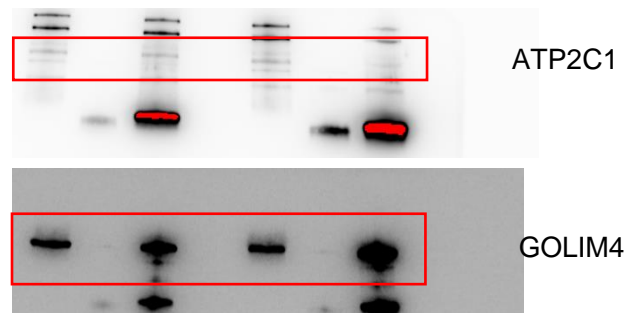

Fig. S11P

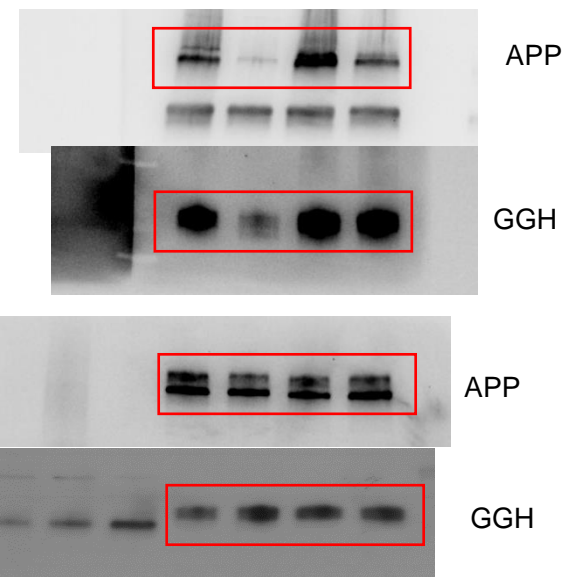

Fig. S11N

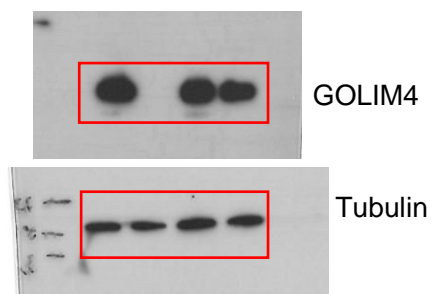

Supplement: jci-134-176355-s235.pdf [file jci-134-176355-s235.pdf]
