# Supplementary material for: Chromosomal 3q amplicon encodes essential regulators of secretory vesicles that drive secretory addiction in cancer
Source: PubMed Central journal article supplement (PMC11178546; doi:10.1172/jci176355), 2024-04-25
Supplement: jci-134-176355-s239.pdf [file jci-134-176355-s239.pdf]

Table S4. Primer sequences.

| <b>qPCR primers</b>                           |                                                                                               |                                                                      |
|-----------------------------------------------|-----------------------------------------------------------------------------------------------|----------------------------------------------------------------------|
| <b>Gene</b>                                   | <b>Forward (5'-3')</b>                                                                        | <b>Reverse (5'-3')</b>                                               |
| BAG6                                          | TGCTGCCTTCATACAACGCCTC                                                                        | GTCCACCATAGAGAAGTTCTGGC                                              |
| GGA1                                          | TCACGGAGATGGTGATGAGCCA                                                                        | TCCTCTGTGTCACCTCGCCAGTC                                              |
| UBL4A                                         | TGGTCTCCGAGAAGCTGAACGT                                                                        | GACCACTAGGTTGAGCTTGGAG                                               |
| GET3                                          | GTCAGCGAACAGTTCAAGGACC                                                                        | TCCTGGATCAGCCTCTCTGTCT                                               |
| GET4                                          | CGTTTGTGGAGCCGCTGCTTAA                                                                        | GATGGCTGGTACTGCTCACACA                                               |
| TMED3                                         | TCCACCTTCTCTCACAAGACCG                                                                        | CCGTTTTCAGAGCCCTCATGGATG                                             |
| GOLGA4                                        | AGTCGGGTGAAACAGGAGGTTG                                                                        | GCTTCTTGGTCAGTTCCTGCTC                                               |
| GABBR1                                        | CCTGAACAAGACATCTGGAGGAG                                                                       | GCTGGCATCAAACACCACATGG                                               |
| FBLN1                                         | GTGGCTACCATCTCAACGAGGA                                                                        | CTTGCAATTCGCAGCGGAAACTG                                              |
| SERPINE2                                      | ATCCAGCCTCTGCCTGTGATTC                                                                        | TTGACGAGGACCAGTCTGGTGA                                               |
| CLEC11A                                       | ACACCCGCGATGCCGTGCAAG                                                                         | CGAGAGCAGGAAGCACTTGTGG                                               |
| GGH                                           | TGCAGGTGCGAGAGTTGTACCA                                                                        | GAGCGTCTGAGGTCAACACTTC                                               |
| HTRA1                                         | CAGACGTGATCTCAGGAGCGTA                                                                        | TCGCTGACATCATTGGCGGAGA                                               |
| LAMC2                                         | TACAGAGCTGGAAGCAGGATG                                                                         | GTTCTCTTGGCTCCTCACCTTG                                               |
| LOXL2                                         | TGACTGCAAGCACAGGAGGAT                                                                         | TCCGAATGTCTCCACCTGGAT                                                |
| APP                                           | CCTTCTCGTTCCTGACAAGTGC                                                                        | GGCAGCAACATGCCGTAGTCAT                                               |
| GOLIM4                                        | ATGAGCCTCGTGAACAAGGACC                                                                        | CTCTCACTTGCTCGGCTTCTTC                                               |
| ATP2C1                                        | GGAACTGGTCAGATGTGGCA                                                                          | AGAGGTCCATGCTCTTCTGCAG                                               |
| RBFOX2                                        | CCAGCTTCAAGCAGATGTGTCC                                                                        | CAATGGGCTCCTCTGAAAGCG                                                |
| GOLIM4 (gdNA)                                 | ATGAGCCTCGTGAACAAGGACC                                                                        | CATCACATACAGTACACCATGG                                               |
| <b>RT-PCR primers</b>                         |                                                                                               |                                                                      |
| GOLIM4 (Exons 6-8)                            | GCACACCAAGACATACATACAG                                                                        | CTTCTCCCTGCTGTGTTGTAAC                                               |
| <b>Clone primers</b>                          |                                                                                               |                                                                      |
| <b>Primers for gene expression (pcDNA3.1)</b> |                                                                                               |                                                                      |
| GOLIM4 (HA tag)                               | CCGCTCGAGATGTACCCATACGATGTTCCAGATTACG<br>CTATGGGAAACGGGATGTGCTCCCGAAAGCAGAAGCG<br>GGGATCCCCCT | GGGGATCCCTACATTTTCAGCTCTTCGATGTGA                                    |
| GOLIM4 (KR mut)                               | CCGCTCGAGATGGGAAACGGGATGTGCTCCCGAAAGC<br>AGgcGgcGATTTTCCAGACGCTGCTGC                          | GGGGATCCCTACATTTTCAGCTCTTCGATGTGA                                    |
| GOLIM4 (DFLV mut)                             | ATTTAATGTTTCTTGTGCTTCTAACTTATAAGCAGCA<br>GCAGCTTCCTTTGCTTTTTTATGTTCAAG                        | CTTGAACATAAAAAGCAAAGGAAGCTGCTGCTGCTTA<br>TAAGTTAGAAGCACAAGAAACATTAAT |
| GOLIM4 (Flag tag)                             | CCGCTCGAGATGGACTACAAAGACGATGACGACAAG<br>ATGGGAAACGGGATGTGC                                    | GGGGATCCCTACATTTTCAGCTCTTCGATGTGA                                    |
| GOLIM4 (1-245)                                | CCGCTCGAGATGGACTACAAAGACGATGACGACAAG<br>ATGGGAAACGGGATGTGC                                    | GGGGATCCTTATGGAATCCTATTCAGAGTATCTTTCAG                               |
| GOLIM4 (1-175)                                | CCGCTCGAGATGGACTACAAAGACGATGACGACAAG<br>ATGGGAAACGGGATGTGC                                    | GGGGATCCTTAATACAGTCTCTTTTAGCTTAGAAAGTG<br>TTCTT                      |
| GOLIM4 (1-87)                                 | CCGCTCGAGATGGACTACAAAGACGATGACGACAAG<br>ATGGGAAACGGGATGTGC                                    | GGGGATCCTTATTCTTTGCTTTTTTATGTTCAAGT                                  |
| CAB45 (HA tag)                                | GCAGAATTCATGGTCTGGCCCTGGGT                                                                    | CGTGGATCCAGCGTAGTCTGGGACGTCGTATGGGTAAA<br>ACTCCTCGTGACGCTG           |
| <b>Primers for gene expression (pRFP-C3)</b>  |                                                                                               |                                                                      |
| GOLIM4                                        | CCGCTCGAGATGTACCCATACGATGTTCCAGATTACG<br>CTATGGGAAACGGGATGTGCTCCCGAAAGCAGAAGCG<br>GGGATCCCCCT | GGGGATCCCTACATTTTCAGCTCTTCGATGTGA                                    |
| <b>Primers for gene expression (TurboID)</b>  |                                                                                               |                                                                      |
| GOLIM4 (TurboID)                              | CCGCTCGAGATGTACCCATACGATGTTCCAGATTACG<br>CTATGGGAAACGGGATGTGCTCCCGAAAGCAGAAGCG<br>GGGATCCCCCT | GCTCTAGACTACATTTTCAGCTCTTCGATGTGA                                    |
